# Supplementary material for: Dynamic radiomics for predicting the efficacy of antiangiogenic therapy in colorectal liver metastases
Source: PubMed Central journal article supplement (PMC9939899; doi:10.3389/fonc.2023.992096), 2023-02-06
Supplement: DataSheet_1.pdf [file DataSheet_1.pdf]

## Supplementary Material

### 1 SUPPLEMENTARY FIGURES

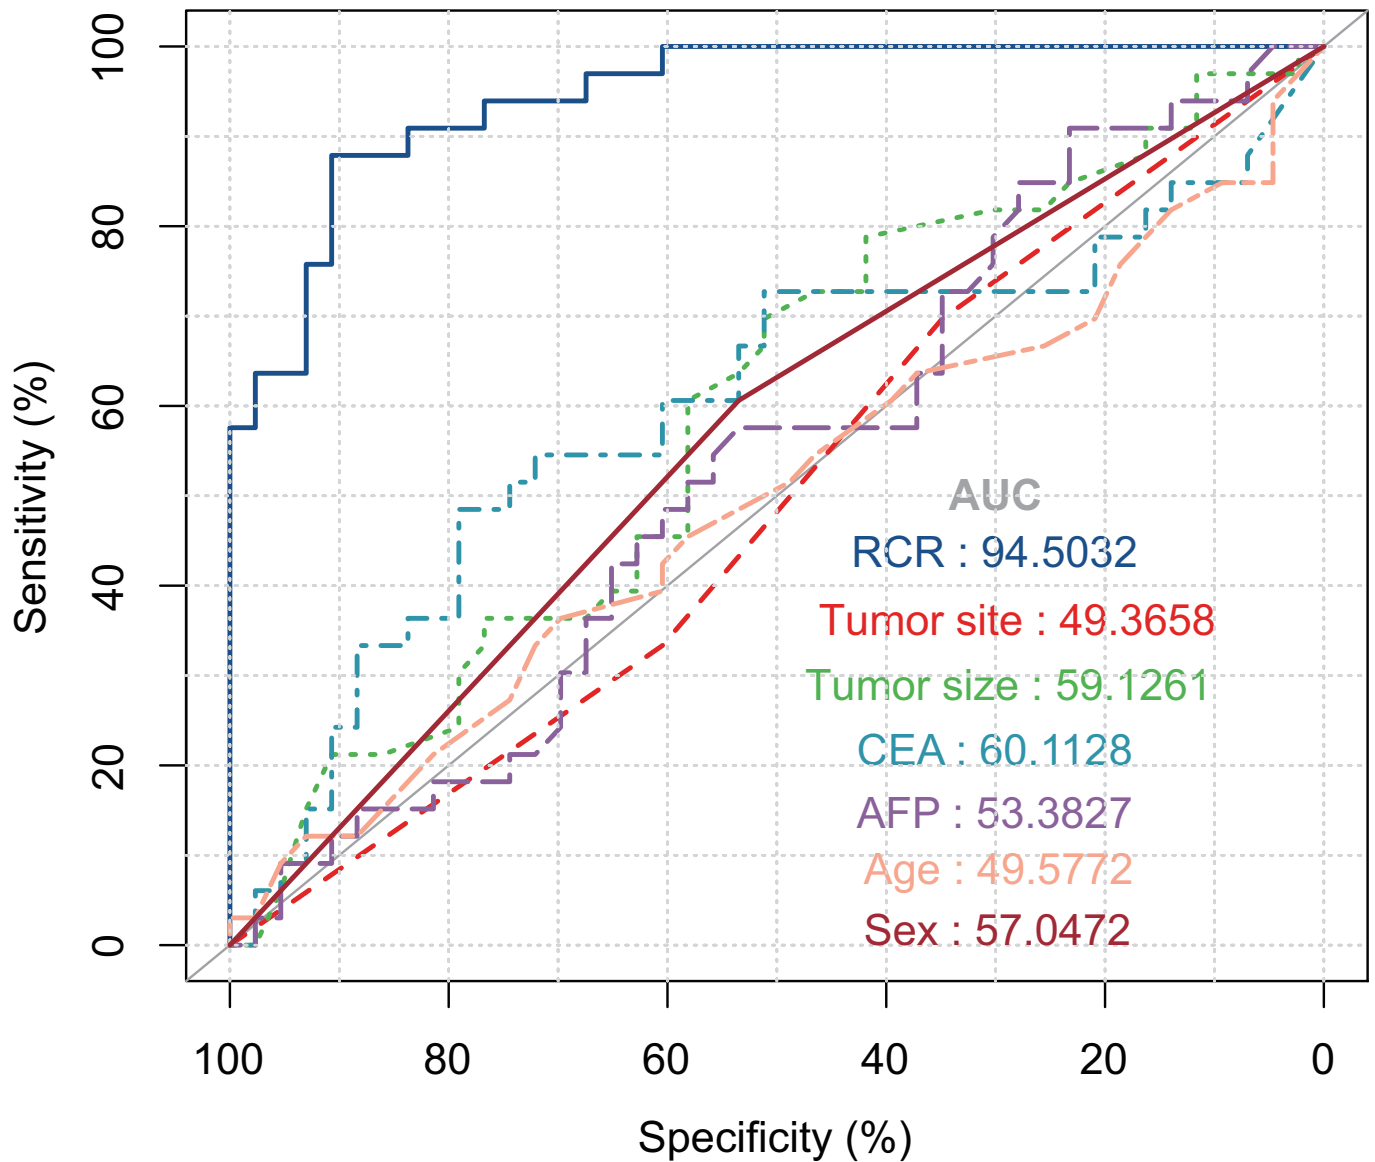

**Figure S1.** ROC curves for RCR features using scores established by LDA and other clinical predictors.

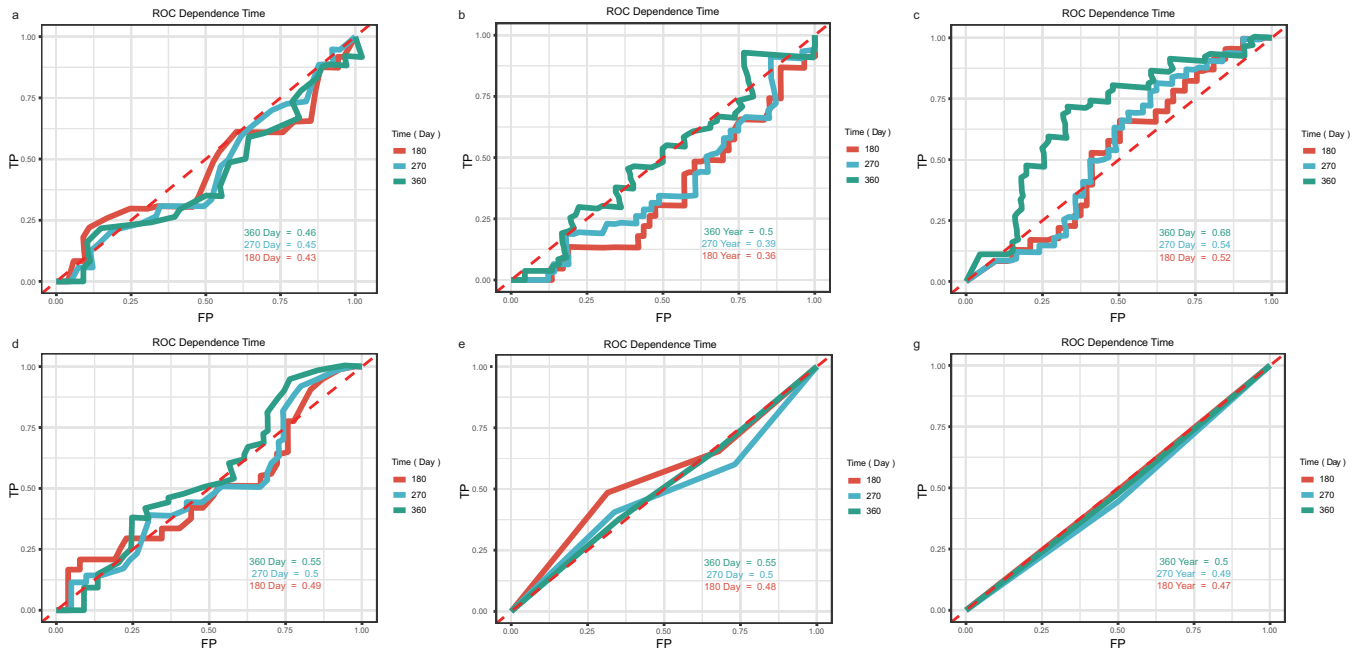

**Figure S2.** Time-dependent ROC curves for Age (a), AFP (b), CEA (c), Tumor size (d), Tumor site (e) and Sex (g).

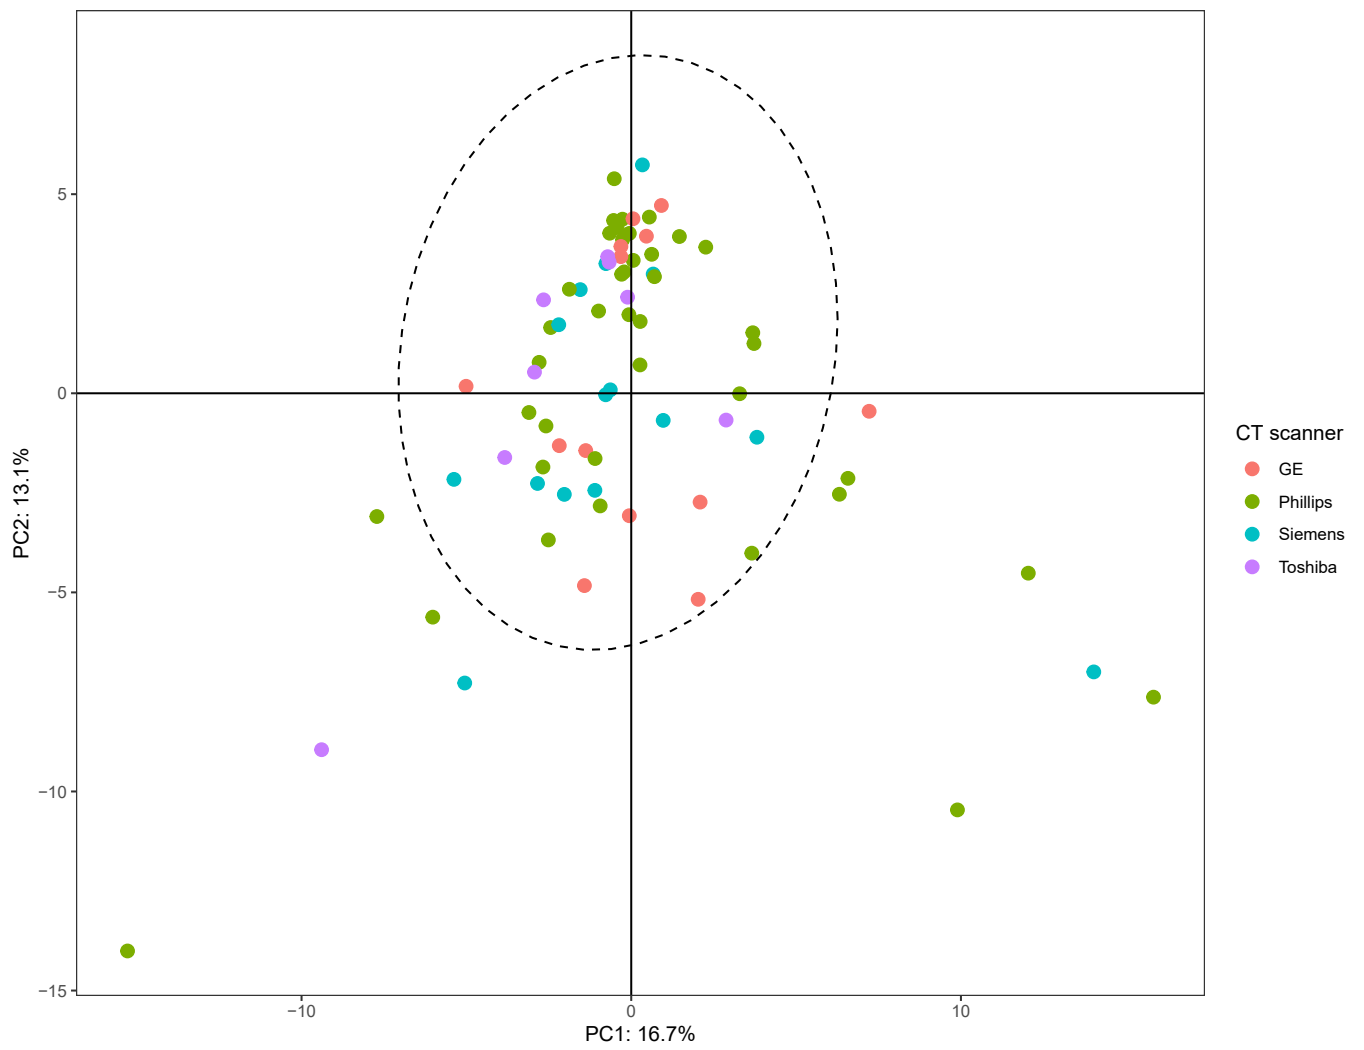

**Figure S3.** PCA for RCR features.
